# Supplementary material for: Large-Scale Effects of Aridity on Leaf Nitrogen and Phosphorus Concentrations of Terrestrial Plants
Source: MDPI journal article supplement (doi:10.3390/cli10110171), 2022-11-07
Supplement: s1 [file s1]

**Table S1.** The  $R^2$  of relationships between environmental variables and leaf N and P and N:P ratio based on unitary regression models.

| <b>Life form</b> | <b>Leaf concentrations</b> | <b>Bioclimatic variables</b> | <b><math>R^2</math></b> | <b><math>p</math>-Value</b> |
|------------------|----------------------------|------------------------------|-------------------------|-----------------------------|
| Fern             | Log10[Leaf N]              | Bio15                        | 0.293                   | 0.056                       |
| Fern             | Log10[Leaf P]              | Bio12                        | 0.280                   | 0.063                       |
| Fern             | Log10[N:P Ratio]           | Bio4                         | 0.216                   | 0.109                       |
| Fern             | Log10[Leaf N]              | Bio12                        | 0.181                   | 0.148                       |
| Fern             | Log10[Leaf P]              | Bio4                         | 0.170                   | 0.161                       |
| Fern             | Log10[Leaf P]              | Bio1                         | 0.164                   | 0.171                       |
| Fern             | Log10[N:P Ratio]           | Aridity                      | 0.156                   | 0.182                       |
| Fern             | Log10[Leaf P]              | Aridity                      | 0.154                   | 0.184                       |
| Fern             | Log10[Leaf N]              | Bio1                         | 0.139                   | 0.210                       |
| Fern             | Log10[N:P Ratio]           | Bio12                        | 0.104                   | 0.282                       |
| Fern             | Log10[N:P Ratio]           | Bio15                        | 0.082                   | 0.344                       |
| Fern             | Log10[N:P Ratio]           | Bio1                         | 0.046                   | 0.482                       |
| Fern             | Log10[Leaf N]              | Aridity                      | 0.007                   | 0.779                       |
| Fern             | Log10[Leaf P]              | Bio15                        | 0.003                   | 0.858                       |
| Fern             | Log10[Leaf N]              | Bio4                         | 0.000                   | 0.988                       |
| Herb             | Log10[Leaf N]              | Bio1                         | 0.028                   | 0.000                       |
| Herb             | Log10[N:P Ratio]           | Bio1                         | 0.013                   | 0.014                       |
| Herb             | Log10[Leaf P]              | Aridity                      | 0.013                   | 0.015                       |
| Herb             | Log10[N:P Ratio]           | Bio15                        | 0.009                   | 0.034                       |
| Herb             | Log10[N:P Ratio]           | Aridity                      | 0.008                   | 0.049                       |
| Herb             | Log10[N:P Ratio]           | Bio12                        | 0.006                   | 0.082                       |
| Herb             | Log10[Leaf P]              | Bio12                        | 0.004                   | 0.169                       |
| Herb             | Log10[Leaf P]              | Bio15                        | 0.003                   | 0.269                       |
| Herb             | Log10[Leaf N]              | Aridity                      | 0.002                   | 0.352                       |
| Herb             | Log10[Leaf N]              | Bio15                        | 0.001                   | 0.474                       |
| Herb             | Log10[Leaf N]              | Bio12                        | 0.000                   | 0.648                       |
| Herb             | Log10[Leaf P]              | Bio1                         | 0.000                   | 0.867                       |
| Herb             | Log10[Leaf P]              | Bio4                         | 0.000                   | 0.912                       |
| Herb             | Log10[N:P Ratio]           | Bio4                         | 0.000                   | 0.917                       |
| Herb             | Log10[Leaf N]              | Bio4                         | 0.000                   | 0.982                       |
| Shrub            | Log10[Leaf P]              | Bio1                         | 0.234                   | 0.000                       |
| Shrub            | Log10[Leaf N]              | Bio1                         | 0.156                   | 0.000                       |
| Shrub            | Log10[Leaf P]              | Bio4                         | 0.155                   | 0.000                       |
| Shrub            | Log10[Leaf N]              | Bio4                         | 0.136                   | 0.000                       |
| Shrub            | Log10[Leaf N]              | Bio15                        | 0.097                   | 0.000                       |
| Shrub            | Log10[Leaf P]              | Bio15                        | 0.092                   | 0.000                       |
| Shrub            | Log10[N:P Ratio]           | Aridity                      | 0.064                   | 0.000                       |
| Shrub            | Log10[N:P Ratio]           | Bio1                         | 0.058                   | 0.000                       |
| Shrub            | Log10[Leaf P]              | Aridity                      | 0.041                   | 0.000                       |
| Shrub            | Log10[N:P Ratio]           | Bio4                         | 0.020                   | 0.000                       |

|       |                  |         |       |       |
|-------|------------------|---------|-------|-------|
| Shrub | Log10[N:P Ratio] | Bio12   | 0.016 | 0.001 |
| Shrub | Log10[Leaf N]    | Bio12   | 0.007 | 0.024 |
| Shrub | Log10[N:P Ratio] | Bio15   | 0.006 | 0.041 |
| Shrub | Log10[Leaf P]    | Bio12   | 0.001 | 0.446 |
| Shrub | Log10[Leaf N]    | Aridity | 0.000 | 0.585 |
| Tree  | Log10[Leaf P]    | Bio4    | 0.234 | 0.000 |
| Tree  | Log10[N:P Ratio] | Bio4    | 0.158 | 0.000 |
| Tree  | Log10[Leaf P]    | Bio1    | 0.144 | 0.000 |
| Tree  | Log10[N:P Ratio] | Bio1    | 0.099 | 0.000 |
| Tree  | Log10[Leaf P]    | Bio15   | 0.067 | 0.000 |
| Tree  | Log10[Leaf N]    | Bio4    | 0.063 | 0.001 |
| Tree  | Log10[N:P Ratio] | Bio15   | 0.048 | 0.003 |
| Tree  | Log10[Leaf N]    | Bio1    | 0.038 | 0.008 |
| Tree  | Log10[Leaf N]    | Aridity | 0.026 | 0.029 |
| Tree  | Log10[N:P Ratio] | Bio12   | 0.019 | 0.064 |
| Tree  | Log10[Leaf N]    | Bio15   | 0.013 | 0.116 |
| Tree  | Log10[Leaf P]    | Bio12   | 0.013 | 0.122 |
| Tree  | Log10[Leaf P]    | Aridity | 0.012 | 0.139 |
| Tree  | Log10[Leaf N]    | Bio12   | 0.000 | 0.863 |
| Tree  | Log10[N:P Ratio] | Aridity | 0.000 | 0.980 |
| Vine  | Log10[Leaf N]    | Bio1    | 0.312 | 0.001 |
| Vine  | Log10[Leaf P]    | Bio1    | 0.186 | 0.015 |
| Vine  | Log10[Leaf P]    | Bio12   | 0.134 | 0.042 |
| Vine  | Log10[N:P Ratio] | Bio12   | 0.061 | 0.179 |
| Vine  | Log10[N:P Ratio] | Aridity | 0.059 | 0.187 |
| Vine  | Log10[Leaf P]    | Bio4    | 0.051 | 0.222 |
| Vine  | Log10[N:P Ratio] | Bio15   | 0.040 | 0.282 |
| Vine  | Log10[N:P Ratio] | Bio4    | 0.034 | 0.324 |
| Vine  | Log10[Leaf P]    | Aridity | 0.029 | 0.361 |
| Vine  | Log10[Leaf N]    | Bio12   | 0.026 | 0.389 |
| Vine  | Log10[Leaf P]    | Bio15   | 0.017 | 0.483 |
| Vine  | Log10[N:P Ratio] | Bio1    | 0.014 | 0.528 |
| Vine  | Log10[Leaf N]    | Bio4    | 0.004 | 0.727 |
| Vine  | Log10[Leaf N]    | Aridity | 0.002 | 0.816 |
| Vine  | Log10[Leaf N]    | Bio15   | 0.002 | 0.826 |
